# Supplementary material for: Comparative Study of Green-Synthesized and Market-Procured CuO and FeO Nanoparticles on the Growth and Stress Tolerance in Rice Seedlings
Source: Research Square preprint supplement (doi:10.21203/rs.3.rs-7025406/v1), 2025-07-10

Table 1: List of Primer used in the study: F1 -Forward primer, R1-Reverse primer

| **S.No.** | **Gene Name** | **Sequence** | **Tm ˚C** | **Base pairs** |
| --- | --- | --- | --- | --- |
| 1 | *OsCOPT7 F1* | GGACGTGACGATCCTGTTTG | 56.08 | 20 |
| 2 | *OsCOPT7 R1* | TCGAGGTACTGGTAGAAGGC | 55.29 | 20 |
| 3 | *OsMDHAR4-1 F1* | GTACAACGAACACGGCATTG | 57.3 | 20 |
| 4 | *OsMDHAR4-1 R1* | TTTCCCCACTGGATGTAAGC | 57.3 | 20 |
| 5 | *OsDHAR1 F1* | CCTTTATCAACGGGCAGAAC | 57.3 | 20 |
| 6 | *OsDHAR1 R1* | AAATGCTCCAGAGCAACCTG | 57.3 | 20 |
| 7 | *Os GR1 F1* | TCAACATTCCTGGGAAGGAG | 57.3 | 20 |
| 8 | *Os GR1 R1* | CAATATATCCGCCACCAAGG | 57.3 | 20 |
| 9 | *OsYSL15 F1* | TGCGGTAATCACCATACCGA | 55.93 | 20 |
| 10 | *OsYSL15 R1* | AAGAGAGCGATCTTGCCGTA | 55.96 | 20 |
| 1 | *Os actin11F1* | CAGCCACACTGTCCCCATCTA | 55.00 | 20 |
| 2 | *Os actin11R1* | AGCAAGGTCGAGACGAAGGA | 55.00 | 20 |

Fig 1- Screening of green synthesized (GS) and Market procured (MP) CuO NPs


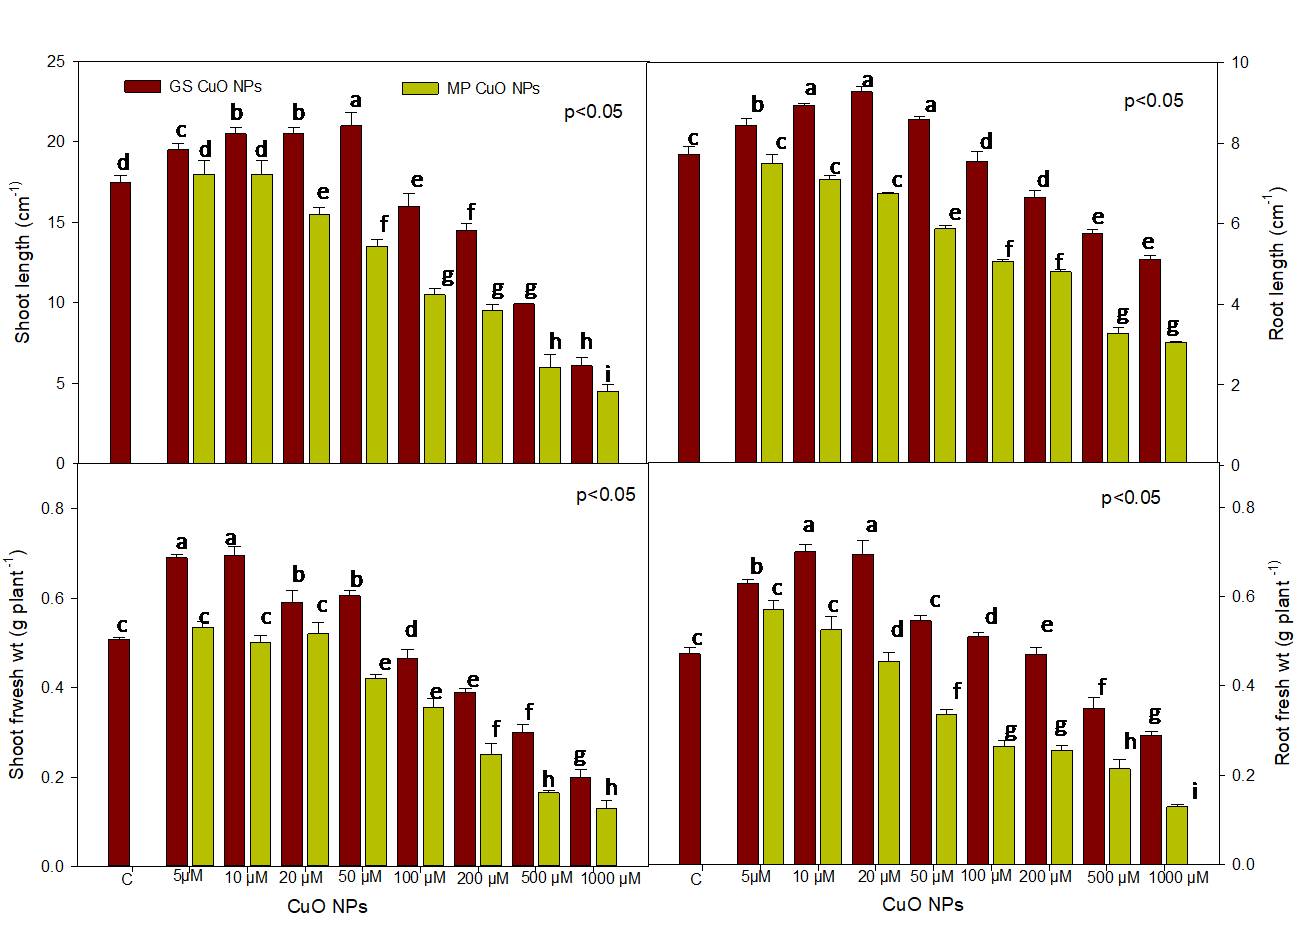


Fig 2- Screening of green synthesized (GS) and Market procured (MP) FeO NPs


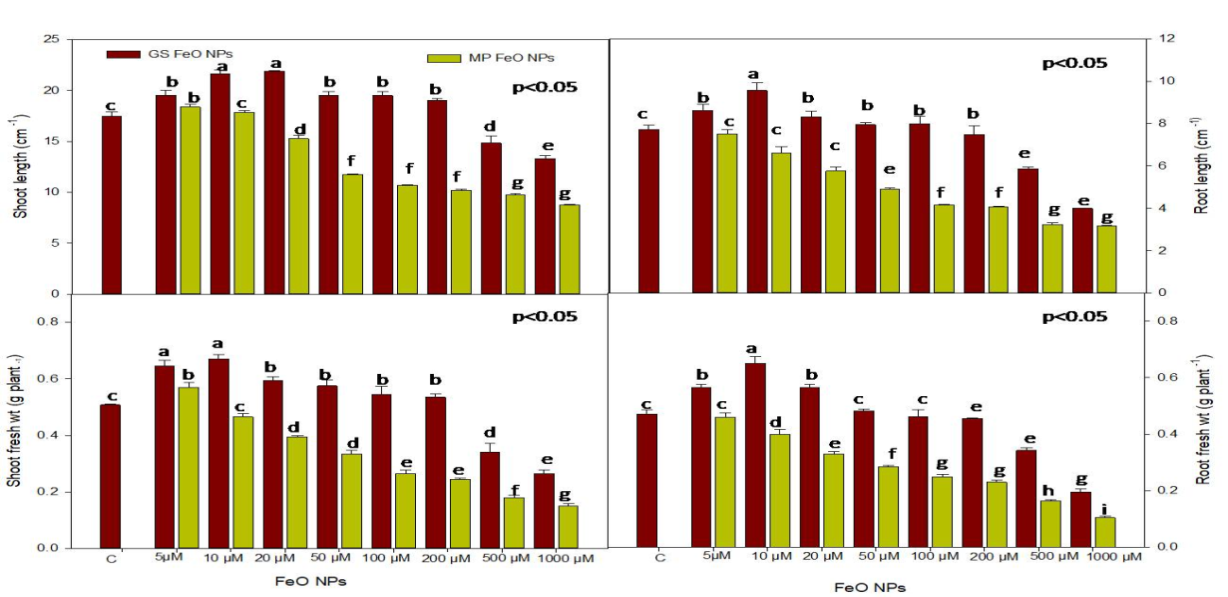

Supplement: Supplementary file 1 [file 3d61d716e9c1ca6f8a0076c0.docx]
